# Supplementary material
Source: Springer Nature journal article supplement (http://www.springermedizin.de/resource/supplementary/13049_2009_53_MOESM16_ESM.pdf/9665786)

CPD  
2033Hz

+0°

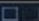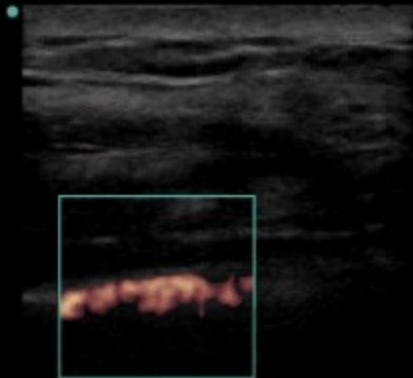Sup  
L25  
MI  
0.9  
TIS  
0.6A  
B

2.6

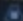

CPD

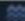

Med

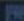

Scale

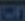

High

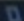

+0°

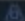

Show

Supplement: MOESM16 [file 9665786]
